# Supplementary material for: Development and application of versatile high density microarrays for genome-wide analysis of Streptomyces coelicolor: characterization of the HspR regulon
Source: PubMed Central journal article supplement (PMC2687793; doi:10.1186/gb-2009-10-1-r5), 2009-01-16

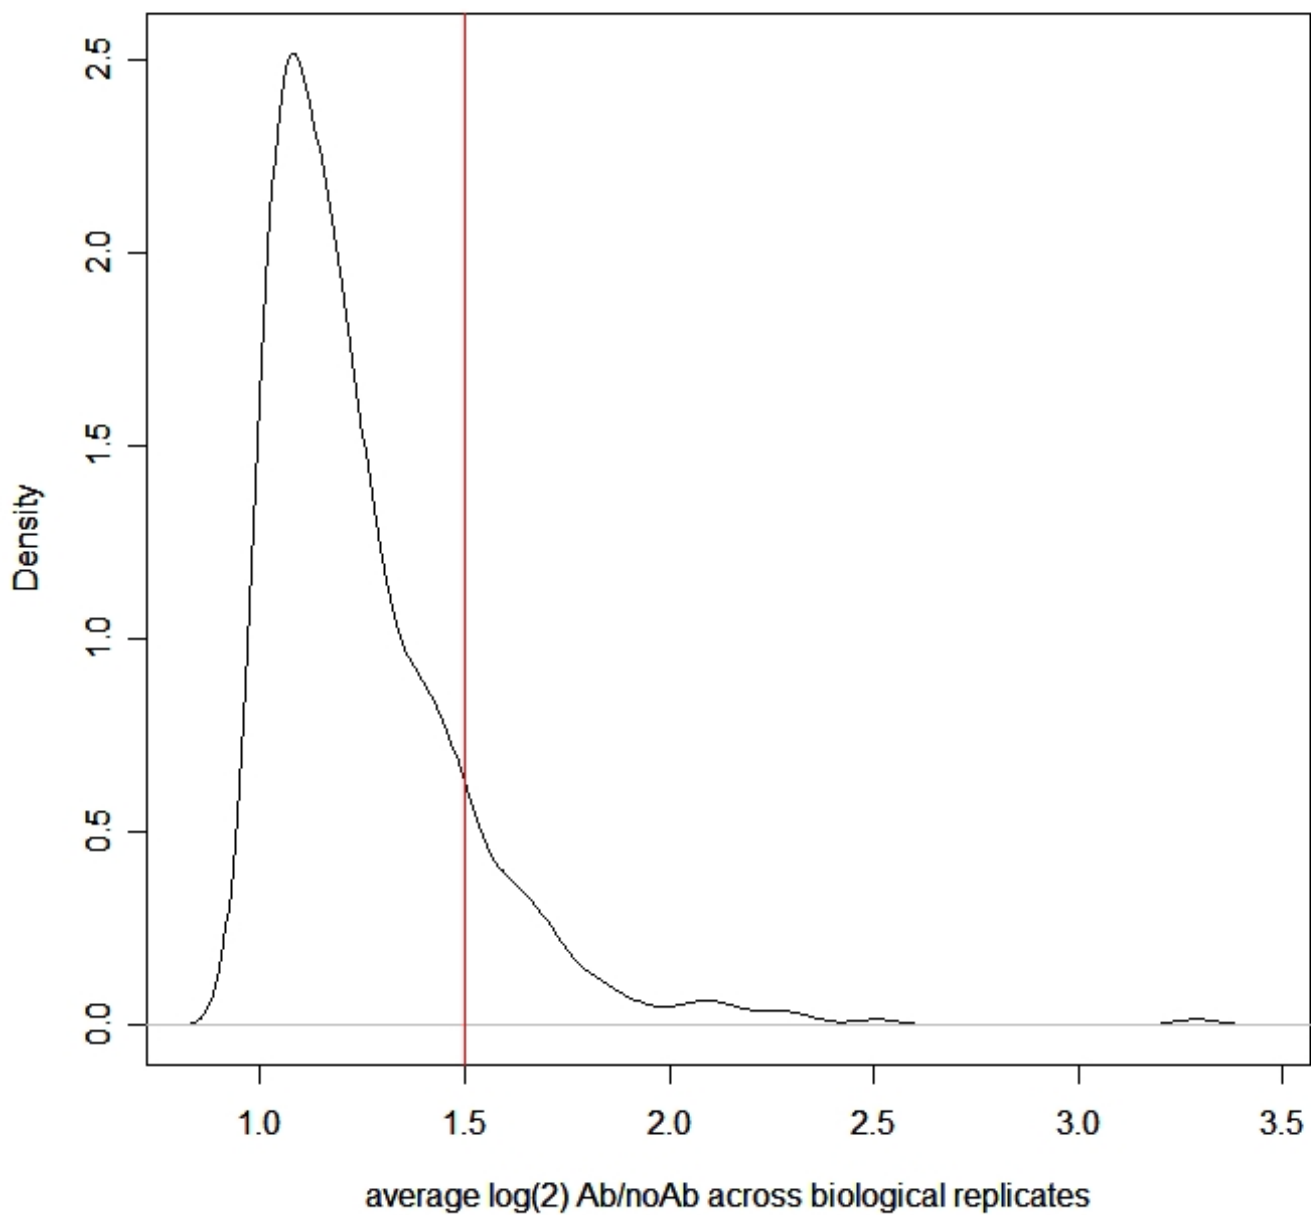

Supplement: gb-2009-10-1-r5-S2.pdf [file gb-2009-10-1-r5-S2.pdf]
