# Supplementary material for: Development and application of versatile high density microarrays for genome-wide analysis of Streptomyces coelicolor: characterization of the HspR regulon
Source: PubMed Central journal article supplement (PMC2687793; doi:10.1186/gb-2009-10-1-r5), 2009-01-16
Supplement: gb-2009-10-1-r5-S4.pdf [file gb-2009-10-1-r5-S4.pdf]

**Additional File 4 - The heat-shock stimulon of *Streptomyces coelicolor***

Genes are ranked by physical order within genome. Significance cut-off of pfp &lt; 0.15

| Gene    | Average log(2)<br>42°C /30 °C | pfp value | Annotation                                                                |
|---------|-------------------------------|-----------|---------------------------------------------------------------------------|
| SCO0117 | 3.72                          | 0.02      | putative oxidoreductase                                                   |
| SCO0162 | 3.19                          | 0.07      | conserved hypothetical protein                                            |
| SCO0167 | 3.47                          | 0.04      | conserved hypothetical protein                                            |
| SCO0168 | 3.81                          | 0.02      | possible regulator protein                                                |
| SCO0169 | 3.26                          | 0.06      | conserved hypothetical protein                                            |
| SCO0173 | 2.49                          | 0.14      | hypothetical protein                                                      |
| SCO0174 | 4.27                          | 0.01      | putative DNA-binding protein                                              |
| SCO0177 | 3.24                          | 0.06      | putative membrane protein                                                 |
| SCO0179 | 2.34                          | 0.13      | putative zinc-containing dehydrogenase                                    |
| SCO0181 | 3.38                          | 0.04      | hypothetical protein                                                      |
| SCO0199 | 3.51                          | 0.03      | putative alcohol dehydrogenase                                            |
| SCO0200 | 3.60                          | 0.03      | conserved hypothetical protein                                            |
| SCO0201 | 2.96                          | 0.09      | putative integral membrane protein                                        |
| SCO0208 | 2.38                          | 0.15      | pyruvate phosphate dikinase                                               |
| SCO0210 | 2.51                          | 0.13      | hypothetical protein                                                      |
| SCO0212 | 2.93                          | 0.09      | hypothetical protein                                                      |
| SCO0213 | 2.62                          | 0.13      | putative nitrate/nitrite transporter protein                              |
| SCO0214 | 2.72                          | 0.11      | conserved hypothetical protein                                            |
| SCO0216 | 3.03                          | 0.09      | narG2,nitrate reductase alpha chain                                       |
| SCO0217 | 2.83                          | 0.12      | narH2,nitrate reductase beta chain                                        |
| SCO0219 | 3.51                          | 0.03      | narI2,putative nitrate reductase delta chain                              |
| SCO0463 | 2.66                          | 0.09      | conserved hypothetical protein                                            |
| SCO0596 | 3.43                          | 0.03      | putative DNA-binding protein                                              |
| SCO0600 | 2.95                          | 0.11      | sig8,RNA polymerase sigma factor sig8                                     |
| SCO0678 | 4.25                          | 0.01      | hypothetical protein                                                      |
| SCO0679 | 3.21                          | 0.06      | hypothetical protein                                                      |
| SCO0761 | 2.83                          | 0.09      | hypothetical protein                                                      |
| SCO0776 | 2.88                          | 0.09      | putative integral membrane protein                                        |
| SCO0779 | 2.44                          | 0.14      | conserved hypothetical protein                                            |
| SCO0784 | 2.90                          | 0.09      | putative secreted protein                                                 |
| SCO1002 | 4.57                          | 0.00      | hypothetical protein                                                      |
| SCO1131 | 3.27                          | 0.04      | conserved hypothetical protein                                            |
| SCO1132 | 4.46                          | 0.01      | putative oxidoreductase                                                   |
| SCO1133 | 4.29                          | 0.01      | putative oxidoreductase, molybdopterin binding subunit                    |
| SCO1134 | 4.64                          | 0.01      | putative oxidoreductase, iron-sulphur binding subunit                     |
| SCO1225 | 2.67                          | 0.13      | putative osmoprotectant transporter                                       |
| SCO1373 | 2.25                          | 0.14      | conserved hypothetical protein                                            |
| SCO2047 | 2.47                          | 0.12      | putative DNA-binding protein                                              |
| SCO2055 | 2.86                          | 0.07      | hypothetical protein                                                      |
| SCO2256 | 3.17                          | 0.05      | panB,3-methyl-2-oxobutanoate hydroxymethyltransferase                     |
| SCO2315 | 3.63                          | 0.03      | putative membrane protein                                                 |
| SCO2341 | 3.36                          | 0.04      | hypothetical protein                                                      |
| SCO2342 | 2.50                          | 0.13      | putative secreted protein                                                 |
| SCO2645 | 4.12                          | 0.02      | putative integral membrane protein                                        |
| SCO2646 | 4.45                          | 0.01      | putative integral membrane protein                                        |
| SCO2811 | 2.33                          | 0.12      | putative regulator                                                        |
| SCO2828 | 2.59                          | 0.12      | probable amino acid ABC transporter protein, solute-binding component.    |
| SCO2829 | 2.63                          | 0.11      | probable amino acid ABC transporter protein, integral membrane component. |

|         |      |      |                                                                           |
|---------|------|------|---------------------------------------------------------------------------|
| SCO2830 | 2.40 | 0.13 | probable amino acid ABC transporter protein, integral membrane component. |
| SCO2928 | 2.36 | 0.11 | putative asnC-family transcriptional regulator                            |
| SCO3105 | 2.53 | 0.12 | hypothetical protein                                                      |
| SCO3106 | 2.41 | 0.14 | putative lipoprotein                                                      |
| SCO3158 | 2.74 | 0.09 | hypothetical protein                                                      |
| SCO3187 | 2.88 | 0.08 | conserved hypothetical protein                                            |
| SCO3202 | 2.54 | 0.12 | hrdD,RNA polymerase principal sigma factor                                |
| SCO3356 | 2.31 | 0.13 | sigE, ECF sigma factor                                                    |
| SCO3357 | 2.25 | 0.13 | cseA, lipoprotein                                                         |
| SCO3537 | 2.68 | 0.11 | putative DNA-binding protein                                              |
| SCO3538 | 2.48 | 0.13 | hypothetical protein                                                      |
| SCO3660 | 2.67 | 0.12 | hypothetical protein                                                      |
| SCO3661 | 4.11 | 0.02 | clpB, ATP-dependent protease ATP-binding subunit                          |
| SCO3668 | 3.53 | 0.03 | hspR,putative heat shock protein                                          |
| SCO3669 | 3.70 | 0.03 | dnaJ,molecular chaperone                                                  |
| SCO3670 | 4.63 | 0.01 | grpE,heat shock protein                                                   |
| SCO3671 | 4.86 | 0.01 | dnaK,heat shock protein 70                                                |
| SCO3802 | 2.91 | 0.09 | putative membrane protein                                                 |
| SCO3937 | 2.41 | 0.12 | putative integrase /recombinase                                           |
| SCO3945 | 3.69 | 0.03 | cydA, putative cytochrome oxidase subunit I                               |
| SCO3946 | 2.82 | 0.08 | cydB, putative cytochrome oxidase subunit II                              |
| SCO4157 | 2.20 | 0.13 | putative protease                                                         |
| SCO4198 | 2.31 | 0.14 | putative DNA-binding protein                                              |
| SCO4296 | 3.79 | 0.03 | groEL2,chaperonin 2                                                       |
| SCO4615 | 3.52 | 0.03 | integrase                                                                 |
| SCO4616 | 4.58 | 0.01 | xis,excisionase                                                           |
| SCO4617 | 3.27 | 0.04 | putative ATP-binding protein                                              |
| SCO4618 | 3.78 | 0.02 | hypothetical protein                                                      |
| SCO4619 | 3.46 | 0.03 | putative integral membrane protein                                        |
| SCO4620 | 3.14 | 0.04 | traB1,putative sporulation-related protein                                |
| SCO4621 | 2.44 | 0.11 | traA1,putative sporulation-related protein                                |
| SCO4624 | 4.65 | 0.01 | hypothetical protein                                                      |
| SCO4625 | 3.23 | 0.03 | conserved hypothetical protein                                            |
| SCO4626 | 3.96 | 0.01 | hypothetical protein                                                      |
| SCO4761 | 3.75 | 0.03 | groES,10 kD chaperonin cpn10                                              |
| SCO4762 | 4.05 | 0.02 | groEL1,60 kD chaperonin cpn60                                             |
| SCO4903 | 2.56 | 0.12 | putative membrane protein                                                 |
| SCO5236 | 2.60 | 0.11 | nagB,putative glucosamine phosphate isomerase                             |
| SCO5237 | 3.39 | 0.03 | putative oxidoreductase                                                   |
| SCO5238 | 2.21 | 0.14 | putative TetR-family protein                                              |
| SCO5269 | 2.17 | 0.14 | hypothetical protein                                                      |
| SCO5285 | 4.66 | 0.01 | lon,ATP-dependent protease                                                |
| SCO5848 | 2.43 | 0.11 | agaZ,tagatose 6-phosphate kinase                                          |
| SCO5850 | 2.09 | 0.14 | conserved hypothetical protein                                            |
| SCO5917 | 4.08 | 0.02 | conserved hypothetical protein                                            |
| SCO6174 | 2.25 | 0.13 | hypothetical protein                                                      |
| SCO6499 | 4.35 | 0.01 | gvpO,putative gas vesicle synthesis protein                               |
| SCO6500 | 3.58 | 0.03 | gvpA,putative gas vesicle synthesis protein                               |
| SCO6502 | 2.85 | 0.09 | gvpG,putative gas vesicle synthesis protein                               |
| SCO6504 | 3.04 | 0.09 | conserved hypothetical protein                                            |
| SCO6505 | 2.70 | 0.12 | gvpJ,putative gas vesicle synthesis protein                               |

|         |      |      |                                                |
|---------|------|------|------------------------------------------------|
| SCO6515 | 3.21 | 0.05 | pfpl ,putative protease                        |
| SCO7095 | 2.87 | 0.07 | putative hydrolase                             |
| SCO7100 | 2.51 | 0.10 | putative oxidoreductase                        |
| SCO7101 | 2.69 | 0.09 | putative dehydrogenase                         |
| SCO7189 | 2.62 | 0.11 | hypothetical protein                           |
| SCO7238 | 3.72 | 0.03 | hypothetical protein                           |
| SCO7277 | 2.55 | 0.12 | putative regulator protein                     |
| SCO7278 | 2.73 | 0.11 | putative RNA polymerase sigma factor           |
| SCO7317 | 3.60 | 0.03 | hypothetical protein                           |
| SCO7325 | 3.53 | 0.03 | anti-sigma factor antagonist                   |
| SCO7442 | 2.57 | 0.13 | hypothetical protein                           |
| SCO7446 | 2.34 | 0.13 | putative regulator                             |
| SCO7646 | 4.02 | 0.01 | putative membrane protein                      |
| SCO7734 | 2.43 | 0.13 | hypothetical protein                           |
| SCO7735 | 2.36 | 0.12 | hypothetical protein                           |
| SCO7747 | 3.72 | 0.03 | conserved hypothetical protein                 |
| SCO7755 | 2.88 | 0.09 | conserved hypothetical protein                 |
| SCO7756 | 2.61 | 0.13 | hypothetical protein                           |
| SCO7809 | 2.23 | 0.12 | putative TetR-family transcriptional regulator |
| SCO7821 | 2.53 | 0.13 | putative integral membrane protein             |
