# Supplementary material for: Development and application of versatile high density microarrays for genome-wide analysis of Streptomyces coelicolor: characterization of the HspR regulon
Source: PubMed Central journal article supplement (PMC2687793; doi:10.1186/gb-2009-10-1-r5), 2009-01-16
Supplement: gb-2009-10-1-r5-S5.pdf [file gb-2009-10-1-r5-S5.pdf]

**Additional File 5 - Genes up-regulated in an *hspR* disruption mutant of *Streptomyces coelicolor***

Genes are ranked by physical order within genome. Significance cut-off of pfp < 0.15

| Gene    | Average log(2)<br>WT/hspR<br>mutant | pfp value | Annotation                                              |
|---------|-------------------------------------|-----------|---------------------------------------------------------|
| SCO0037 | -2.12                               | 0.04      | possible sigma factor                                   |
| SCO0262 | -1.96                               | 0.06      | probable LysR-family transcriptional regulator          |
| SCO0627 | -1.98                               | 0.06      | possible ATP utilising protein                          |
| SCO0668 | -1.55                               | 0.11      | possible flavoprotein                                   |
| SCO0720 | -1.58                               | 0.13      | possible integral membrane protein                      |
| SCO0984 | -1.91                               | 0.07      | possible 3-hydroxyacyl-CoA dehydrogenase                |
| SCO1036 | -2.67                               | 0.02      | probable phosphotriesterase-family protein              |
| SCO1203 | -1.83                               | 0.09      | possible MutT-like protein                              |
| SCO1234 | -2.03                               | 0.05      | ureC, urease alpha subunit                              |
| SCO1454 | -1.74                               | 0.11      | possible amino oxidase                                  |
| SCO1457 | -1.73                               | 0.11      | probable transport protein                              |
| SCO1656 | -2.71                               | 0.01      | possible hydrolase                                      |
| SCO2029 | -2.47                               | 0.02      | putative secreted protein                               |
| SCO2091 | -2.07                               | 0.04      | possible membrane protein                               |
| SCO2543 | -2.10                               | 0.04      | possible dihydrodipicolinate synthase                   |
| SCO2570 | -1.75                               | 0.10      | possible secreted protein                               |
| SCO2795 | -1.72                               | 0.12      | probable sugar binding secreted protein                 |
| SCO2818 | -2.37                               | 0.02      | hypothetical protein                                    |
| SCO3044 | -1.64                               | 0.13      | conserved hypothetical protein                          |
| SCO3097 | -2.31                               | 0.03      | possible secreted protein                               |
| SCO3484 | -1.82                               | 0.09      | possible secreted sugar-binding protein                 |
| SCO3488 | -1.69                               | 0.13      | probable transposase remnant                            |
| SCO3660 | -1.62                               | 0.11      | hypothetical protein                                    |
| SCO3661 | -2.27                               | 0.03      | clpB, probable clp-family ATP-binding subunit           |
| SCO3669 | -3.02                               | 0.01      | dnaJ, molecular chaperone                               |
| SCO3670 | -3.84                               | 0.00      | grpE, heat shock protein                                |
| SCO3671 | -4.23                               | 0.00      | dnaK, heat shock protein 70 (fragment)                  |
| SCO3913 | -2.86                               | 0.01      | hypothetical protein                                    |
| SCO3964 | -1.72                               | 0.11      | possible integral membrane protein                      |
| SCO4253 | -4.31                               | 0.00      | conserved hypothetical protein                          |
| SCO4541 | -1.95                               | 0.06      | possible membrane protein                               |
| SCO4984 | -1.90                               | 0.06      | probable aminotransferase                               |
| SCO5039 | -2.50                               | 0.02      | possible penicillin-binding protein                     |
| SCO5247 | -2.09                               | 0.05      | possible deaminase                                      |
| SCO5285 | -2.47                               | 0.02      | lon, ATP-dependent protease                             |
| SCO5354 | -1.63                               | 0.13      | thrA, homoserine dehydrogenase                          |
| SCO5457 | -2.25                               | 0.03      | possible lipoprotein                                    |
| SCO5540 | -1.91                               | 0.07      | cvnA2, unknown                                          |
| SCO5553 | -1.80                               | 0.10      | leuC, 3-isopropylmalate dehydratase large subunit       |
| SCO5617 | -2.66                               | 0.02      | unknown prophage gene                                   |
| SCO6142 | -1.80                               | 0.10      | Unknown                                                 |
| SCO6462 | -1.63                               | 0.13      | ogt2, methylated-DNA-protein-cysteine methyltransferase |
| SCO6587 | -2.07                               | 0.04      | probable dehydrogenase                                  |
| SCO6773 | -1.54                               | 0.13      | possible secreted peptidase                             |
| SCO6847 | -2.76                               | 0.01      | Unknown                                                 |

|         |       |      |                                |
|---------|-------|------|--------------------------------|
| SCO6856 | -3.03 | 0.01 | Unknown                        |
| SCO7063 | -1.70 | 0.11 | conserved hypothetical protein |
| SCO7116 | -1.63 | 0.13 | conserved hypothetical protein |
| SCO7252 | -1.81 | 0.07 | possible regulatory protein    |
| SCO7304 | -2.25 | 0.03 | Unknown                        |
| SCO7354 | -3.57 | 0.00 | Unknown                        |
| SCO7361 | -3.31 | 0.00 | possible DNA-binding protein   |
| SCO7458 | -1.50 | 0.13 | possible membrane protein      |
| SCO7772 | -1.92 | 0.07 | unknown, length 194 aa         |
| SCO7844 | -1.74 | 0.11 | possible DNA-binding protein   |
