# Supplementary material for: Development and application of versatile high density microarrays for genome-wide analysis of Streptomyces coelicolor: characterization of the HspR regulon
Source: PubMed Central journal article supplement (PMC2687793; doi:10.1186/gb-2009-10-1-r5), 2009-01-16
Supplement: gb-2009-10-1-r5-S6.pdf [file gb-2009-10-1-r5-S6.pdf]

## Positions of partial HspR motif sequences in the five tRNA Gln/Glu cluster

motif seq -----TTGAGYNNNNNNNACTCAA -----  
TACCCGTTTTTGGAGCCCCGTCGACCTTCGGGTAATGTTCTTCTCGCGCCGCCGGAGAGCG  
\* \*\*\*\* \*\*

motif seq -----TTGAG  
GGCCGAACGGCCGGGAACCGGAAGCGCAACGCTAGAACAAGAACCCTACGGGGCTTGCG  
\*\*\* \*

motif seq YNNNNNNNACTCAA-----T tRNA-Gln  
TTCCAGTGGCCTATGGTGTAAATTGGCAGCAGACTGATTCTGGTTCAGTTAGTCTAGGTT  
\* \* \* \*

motif seq TGAGYNNNNNNNACTCAA ----- tRNA-Gln  
CGAGTCTGGTAGGCCAGCTCGCAGAGCTTATCTCGCGCCGGGAGCACATCCGCAAGGCC  
\*\*\*\* \* \*\*

motif seq -----TTGAGYNNNNNNNACTCAA----- tRNA-Glu  
CCCGTTGTGTAGCGCCTAGCACGCCGCCCTCTCAAGGCGGTAGCGCCGGTTCGAATCCG  
\* \* \* \*\*\*\*\*

motif seq -----TTGAGYNNNNNNNACTCAA----- tRNA-Glu  
GTCGGGGGTACAGATCCTTCCCGGAGGACAGCTCGGGTCGCTCCCGCTGTCTTCGATGC  
\* \*\* \*\*\*

motif seq -----TTGAGYNNNNNNNACTCAA----- tRNA-Glu  
AGGATCGCTAGGGCCCCCGTTGTGTAGCGCCTAGCACGCCGCCCTCTCAAGGCGGTAGC  
\* \* \* \*\*\*\*\*

motif seq ----- tRNA-Gln  
GCCGGTTCGAATCCGGTCCGGGGTACGAACTGGTCTAAACCACATTGGTCTATGGTGTAA

motif seq -----TTGAGYNNNNNNNACTCAA----- tRNA-Glu  
TTGGCAGCAGACTGATTCTGGTTCAGTTAGTCTAGGTTTCGAGTCTCGGTAGACCAGCTC  
\* \*\*\*\* \*\*

motif seq ----- tRNA-Glu  
GGATCTCGCGCGGAGCAGTAATGAACGCCCGCAAGATCCACGCCCCCGTTGTGTAGCGGC

motif seq -----TTGAGYNNNNNNNACTCAA-----TTGAGYNNNNNNNACTCAA-----  
CTAGCACGCCGCCCTCTCAAGGCGGTAGCGCCGGTTCGAATCCGGTCCGGGGTACTCGAA  
\* \*\* \*\*\*\*\* \* \*\* \*\*\*\* \*

motif seq -----TTGAGYNNNNNNNACTCAA  
GTCCAAGGGGGCTCCGCCGAGGCGGGAGCCCCCTTCGGCGTTCCTCCCGGACGCTACTCG  
\* \* \*\*\*\*

motif seq A-----  
ATGCCGTACCGCCGCGCCGACTCCTCCTCCTGCGCCAGCCGGTGCAGAGCCCGTAGCACC  
\*

motif seq -----  
GGCTGGAAGAGCACCGCCGCCGCGACCCCATCT
