# Supplementary material for: Development and application of versatile high density microarrays for genome-wide analysis of Streptomyces coelicolor: characterization of the HspR regulon
Source: PubMed Central journal article supplement (PMC2687793; doi:10.1186/gb-2009-10-1-r5), 2009-01-16
Supplement: gb-2009-10-1-r5-S11.pdf [file gb-2009-10-1-r5-S11.pdf]

Additional File 11.

A comparison of the level of heat-shock induction in YEME+10% sucrose liquid cultures of heat-shock induced genes identified in the SMMS surface grown cultures (Additional File 4). Genes marked in red are not heat-induced in the YEME cultures. The well-known heat shock genes are marked in yellow. The log ratios represent averages values from two independent biological replicates. After loess normalisation, 'within array' normalisation was applied to each array and then 'scale across normalisation' (as described in Materials and Methods) to normalise across the SMMS and YEME-derived samples.

| Gene    | SMMS log <sub>2</sub><br>42 °C/30 °C | YEME log <sub>2</sub><br>42 °C/30 °C | Annotation                                   |
|---------|--------------------------------------|--------------------------------------|----------------------------------------------|
| SCO0117 | 3.28                                 | 2.45                                 | putative oxidoreductase                      |
| SCO0162 | 2.82                                 | -0.65                                | conserved hypothetical protein               |
| SCO0167 | 3.06                                 | 0.33                                 | conserved hypothetical protein               |
| SCO0168 | 3.36                                 | 0.09                                 | possible regulator protein                   |
| SCO0169 | 2.87                                 | 0.30                                 | conserved hypothetical protein               |
| SCO0173 | 2.19                                 | 0.17                                 | hypothetical protein                         |
| SCO0174 | 3.77                                 | -0.23                                | putative DNA-binding protein                 |
| SCO0177 | 2.86                                 | -0.92                                | putative membrane protein                    |
| SCO0179 | 2.06                                 | 0.00                                 | putative zinc-containing dehydrogenase       |
| SCO0181 | 2.98                                 | -0.32                                | hypothetical protein                         |
| SCO0199 | 3.09                                 | -0.20                                | putative alcohol dehydrogenase               |
| SCO0200 | 3.18                                 | -0.63                                | conserved hypothetical protein               |
| SCO0201 | 2.61                                 | -0.45                                | putative integral membrane protein           |
| SCO0208 | 2.07                                 | -0.17                                | pyruvate phosphate dikinase                  |
| SCO0210 | 2.21                                 | -0.35                                | hypothetical protein                         |
| SCO0212 | 2.59                                 | -0.11                                | hypothetical protein                         |
| SCO0213 | 2.31                                 | -0.12                                | putative nitrate/nitrite transporter protein |
| SCO0214 | 2.40                                 | 0.20                                 | conserved hypothetical protein               |
| SCO0216 | 2.67                                 | -0.45                                | narG2,nitrate reductase alpha chain          |
| SCO0217 | 2.50                                 | -0.25                                | narH2,nitrate reductase beta chain           |
| SCO0219 | 3.10                                 | -0.36                                | narI2,putative nitrate reductase delta chain |
| SCO0463 | 2.35                                 | 4.21                                 | conserved hypothetical protein               |
| SCO0596 | 3.03                                 | 2.90                                 | putative DNA-binding                         |

|         |      |      |                                                                                    |
|---------|------|------|------------------------------------------------------------------------------------|
|         |      |      | protein                                                                            |
| SCO0600 | 2.61 | 2.95 | sigB,RNA polymerase<br>sigma factor sigB                                           |
| SCO0678 | 3.74 | 2.89 | hypothetical protein                                                               |
| SCO0679 | 2.83 | 2.70 | hypothetical protein                                                               |
| SCO0761 | 2.49 | 2.52 | hypothetical protein                                                               |
| SCO0776 | 2.54 | 2.06 | putative integral<br>membrane protein                                              |
| SCO0779 | 2.15 | 1.76 | conserved hypothetical<br>protein                                                  |
| SCO0784 | 2.56 | 1.51 | putative secreted protein                                                          |
| SCO1002 | 4.03 | 4.26 | hypothetical protein                                                               |
| SCO1131 | 2.88 | 1.47 | conserved hypothetical<br>protein                                                  |
| SCO1132 | 3.93 | 2.24 | putative oxidoreductase                                                            |
| SCO1133 | 3.78 | 1.91 | putative oxidoreductase,<br>molybdopterin binding<br>subunit                       |
| SCO1134 | 4.09 | 3.21 | putative oxidoreductase,<br>iron-sulphur binding<br>subunit                        |
| SCO1225 | 2.36 | 2.62 | putative osmoprotectant<br>transporter                                             |
| SCO1373 | 1.93 | 2.23 | conserved hypothetical<br>protein                                                  |
| SCO2047 | 2.18 | 1.21 | putative DNA-binding<br>protein                                                    |
| SCO2055 | 2.52 | 2.15 | hypothetical protein                                                               |
| SCO2256 | 2.79 | 1.51 | panB,3-methyl-2-<br>oxobutanoate<br>hydroxymethyltransferase                       |
| SCO2315 | 3.20 | 3.89 | putative membrane<br>protein                                                       |
| SCO2341 | 2.96 | 3.19 | hypothetical protein                                                               |
| SCO2342 | 2.21 | 2.46 | putative secreted protein                                                          |
| SCO2645 | 3.63 | 2.30 | putative integral<br>membrane protein                                              |
| SCO2646 | 3.92 | 2.67 | putative integral<br>membrane protein                                              |
| SCO2811 | 2.06 | 2.69 | putative regulator                                                                 |
| SCO2828 | 2.29 | 1.64 | probable amino acid ABC<br>transporter protein,<br>solute-binding<br>component.    |
| SCO2829 | 2.32 | 1.06 | probable amino acid ABC<br>transporter protein,<br>integral membrane<br>component. |
| SCO2830 | 2.12 | 0.54 | probable amino acid ABC<br>transporter protein,<br>integral membrane<br>component. |
| SCO2928 | 2.08 | 2.17 | putative asnC-family<br>transcriptional regulator                                  |

|         |      |      |                                                  |
|---------|------|------|--------------------------------------------------|
| SCO3105 | 2.23 | 3.26 | hypothetical protein                             |
| SCO3106 | 2.13 | 2.44 | putative lipoprotein                             |
| SCO3158 | 2.41 | 1.64 | hypothetical protein                             |
| SCO3187 | 2.54 | 0.70 | conserved hypothetical protein                   |
| SCO3202 | 2.24 | 2.54 | hrdD, RNA polymerase principal sigma factor      |
| SCO3356 | 2.03 | 1.02 | sigE, ECF sigma factor                           |
| SCO3357 | 1.99 | 1.16 | cseA, lipoprotein                                |
| SCO3537 | 2.37 | 4.33 | putative DNA-binding protein                     |
| SCO3538 | 2.16 | 4.13 | hypothetical protein                             |
| SCO3660 | 2.35 | 1.24 | hypothetical protein                             |
| SCO3661 | 3.62 | 1.48 | clpB, ATP-dependent protease ATP-binding subunit |
| SCO3668 | 3.12 | 1.64 | hspR, putative heat shock protein                |
| SCO3669 | 3.37 | 1.65 | dnaJ, molecular chaperone                        |
| SCO3670 | 4.08 | 1.96 | grpE, heat shock protein                         |
| SCO3671 | 4.36 | 1.35 | dnaK, heat shock protein 70                      |
| SCO3802 | 2.57 | 1.51 | putative membrane protein                        |
| SCO3937 | 2.13 | 1.15 | putative integrase /recombinase                  |
| SCO3945 | 3.03 | 1.54 | cydA, putative cytochrome oxidase subunit I      |
| SCO3946 | 2.49 | 0.91 | cydB, putative cytochrome oxidase subunit II     |
| SCO4157 | 1.94 | 0.02 | putative protease                                |
| SCO4198 | 2.04 | 1.56 | putative DNA-binding protein                     |
| SCO4296 | 3.41 | 0.84 | groEL2, chaperonin 2                             |
| SCO4615 | 3.10 | 3.58 | integrase                                        |
| SCO4616 | 4.04 | 4.47 | xis, excisionase                                 |
| SCO4617 | 2.72 | 2.86 | putative ATP-binding protein                     |
| SCO4618 | 3.34 | 2.84 | hypothetical protein                             |
| SCO4619 | 3.05 | 2.89 | putative integral membrane protein               |
| SCO4620 | 2.80 | 2.71 | traB1, putative sporulation-related protein      |
| SCO4621 | 2.15 | 2.14 | traA1, putative sporulation-related protein      |
| SCO4624 | 4.10 | 3.80 | hypothetical protein                             |
| SCO4625 | 2.85 | 3.60 | conserved hypothetical protein                   |

|         |      |      |                                                     |
|---------|------|------|-----------------------------------------------------|
| SCO4626 | 3.49 | 5.07 | hypothetical protein                                |
| SCO4761 | 3.30 | 0.88 | groES,10 kD chaperonin<br>cpn10                     |
| SCO4762 | 3.56 | 0.93 | groEL1,60 kD chaperonin<br>cpn60                    |
| SCO4903 | 2.26 | 1.52 | putative membrane<br>protein                        |
| SCO5236 | 2.29 | 1.66 | nagB,putative<br>glucosamine phosphate<br>isomerase |
| SCO5237 | 2.99 | 1.29 | putative oxidoreductase                             |
| SCO5238 | 1.95 | 2.67 | putative TetR-family<br>protein                     |
| SCO5269 | 1.91 | 0.99 | hypothetical protein                                |
| SCO5285 | 4.08 | 2.48 | lon,ATP-dependent<br>protease                       |
| SCO5848 | 2.14 | 3.93 | agaZ,tagatose 6-<br>phosphate kinase                |
| SCO5850 | 1.84 | 3.10 | conserved hypothetical<br>protein                   |
| SCO5917 | 3.60 | 2.39 | conserved hypothetical<br>protein                   |
| SCO6174 | 1.98 | 0.50 | hypothetical protein                                |
| SCO6499 | 3.91 | 3.26 | gvpO,putative gas vesicle<br>synthesis protein      |
| SCO6500 | 3.16 | 3.10 | gvpA,putative gas vesicle<br>synthesis protein      |
| SCO6502 | 2.52 | 1.84 | gvpG,putative gas vesicle<br>synthesis protein      |
| SCO6504 | 2.68 | 2.19 | conserved hypothetical<br>protein                   |
| SCO6505 | 2.38 | 2.14 | gvpJ,putative gas vesicle<br>synthesis protein      |
| SCO6515 | 2.83 | 3.39 | pfpl ,putative protease                             |
| SCO7095 | 2.53 | 2.99 | putative hydrolase                                  |
| SCO7100 | 2.22 | 2.50 | putative oxidoreductase                             |
| SCO7101 | 2.37 | 1.89 | putative dehydrogenase                              |
| SCO7189 | 2.31 | 0.92 | hypothetical protein                                |
| SCO7238 | 3.28 | 2.35 | hypothetical protein                                |
| SCO7277 | 2.24 | 1.73 | putative regulator protein                          |
| SCO7278 | 2.41 | 2.95 | putative RNA polymerase<br>sigma factor             |
| SCO7317 | 3.18 | 1.75 | hypothetical protein                                |
| SCO7325 | 3.11 | 2.70 | anti-sigma factor<br>antagonist                     |
| SCO7442 | 2.26 | 2.62 | hypothetical protein                                |
| SCO7446 | 2.06 | 2.88 | putative regulator                                  |
| SCO7646 | 3.54 | 4.34 | putative membrane<br>protein                        |
| SCO7734 | 2.14 | 0.21 | hypothetical protein                                |
| SCO7735 | 2.08 | 0.51 | hypothetical protein                                |
| SCO7747 | 3.28 | 2.68 | conserved hypothetical<br>protein                   |

|         |      |      |                                                |
|---------|------|------|------------------------------------------------|
| SCO7755 | 2.54 | 3.63 | conserved hypothetical protein                 |
| SCO7756 | 2.30 | 1.86 | hypothetical protein                           |
| SCO7809 | 1.97 | 1.88 | putative TetR-family transcriptional regulator |
| SCO7821 | 2.23 | 1.06 | putative integral membrane protein             |
